# Supplementary material
Source: HighWire-hosted journal article supplement (https://erj.ersjournals.com/content/56/4/2002767)
Supplement: inline-supplementary-material-1 [file inline-supplementary-material-1.pdf]

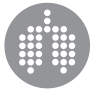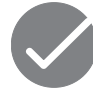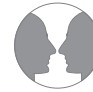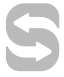

SHAREABLE PDF

# Utility and safety of bronchoscopy during the SARS-CoV-2 outbreak in Italy: a retrospective, multicentre study

Michele Mondoni<sup>1</sup>, Giuseppe Francesco Sferrazza Papa<sup>2,3</sup>, Rocco Rinaldo<sup>1</sup>, Paola Faverio<sup>4</sup>, Almerico Marruchella<sup>4</sup>, Francesca D'Arcangelo<sup>4</sup>, Alberto Pesci<sup>4</sup>, Simone Pasini<sup>5</sup>, Sonia Henchi<sup>6</sup>, Giuseppe Cipolla<sup>6</sup>, Francesco Tarantini<sup>7</sup>, Lisa Giuliani<sup>8</sup>, Fabiano Di Marco<sup>8</sup>, Laura Saracino<sup>9</sup>, Stefano Tomaselli<sup>9</sup>, Angelo Corsico<sup>10</sup>, Stefano Gasparini<sup>11</sup>, Martina Bonifazi<sup>11</sup>, Lina Zuccatosta<sup>11</sup>, Laura Saderi<sup>12</sup>, Giulia Pellegrino<sup>2,3</sup>, Matteo Davi<sup>1</sup>, Paolo Carlucci<sup>1</sup>, Stefano Centanni<sup>1</sup> and Giovanni Sotgiu<sup>12</sup>

**Affiliations:** <sup>1</sup>Respiratory Unit, ASST Santi Paolo e Carlo, San Paolo Hospital, Dept of Health Sciences, Università degli Studi di Milano, Milan, Italy. <sup>2</sup>Dept of Health Sciences, Università degli Studi di Milano, Milan, Italy. <sup>3</sup>Dipartimento di Scienze Neuroriabilitative, Casa di Cura del Policlinico, Milan, Italy. <sup>4</sup>School of Medicine and Surgery, University of Milano Bicocca, Respiratory Unit, San Gerardo Hospital, ASST Monza, Monza, Italy. <sup>5</sup>ASST Lodi, UOC Medicina Interna, Lodi, Italy. <sup>6</sup>ASST Lodi, UOC Pneumologia, Lodi, Italy. <sup>7</sup>Respiratory Unit, Papa Giovanni XXIII Hospital, Bergamo, Italy. <sup>8</sup>Respiratory Unit, Papa Giovanni XXIII Hospital, Dept of Health Sciences, Università degli Studi di Milano, Bergamo, Italy. <sup>9</sup>Respiratory Diseases Unit, Fondazione IRCCS Policlinico San Matteo, Pavia, Italy. <sup>10</sup>Respiratory Diseases Unit, Fondazione IRCCS Policlinico San Matteo, Dept of Internal Medicine and Therapeutics, University of Pavia, Pavia, Italy. <sup>11</sup>Pulmonary Disease Unit, Dept of Internal Medicine, Azienda Ospedali Riuniti, Dept of Biomedical Sciences and Public Health, Università Politecnica delle Marche, Ancona, Italy. <sup>12</sup>Clinical Epidemiology and Medical Statistics Unit, Dept of Medical, Surgical and Experimental Medicine, University of Sassari, Sassari, Italy.

**Correspondence:** Michele Mondoni, Respiratory Unit, ASST Santi Paolo e Carlo, San Paolo Hospital, Dept of Health Sciences, Università degli Studi di Milano, Via A. Di Rudini n.8, 20142, Milan, Italy. E-mail: michele.mondoni@asst-santipaolocarlo.it

 @ERSpublications

Utility and safety of bronchoscopy during the SARS-CoV-2 outbreak <https://bit.ly/3ish52k>

**Cite this article as:** Mondoni M, Sferrazza Papa GF, Rinaldo R, *et al.* Utility and safety of bronchoscopy during the SARS-CoV-2 outbreak in Italy: a retrospective, multicentre study. *Eur Respir J* 2020; 56: 2002767 [<https://doi.org/10.1183/13993003.02767-2020>].

This single-page version can be shared freely online.

## To the Editor:

Severe acute respiratory syndrome coronavirus 2 (SARS-CoV-2) infection and the related disease (coronavirus disease 2019; COVID-19) has been notified throughout Italy since February 2020. Intensive care unit (ICU) admission rate increased following the high incidence of pneumonia-related respiratory failure [1].
